# Supplementary material for: Method of Manufacturing Structural, Optically Transparent Glass Fiber-Reinforced Polymers (tGFRP) Using Infusion Techniques with Epoxy Resin Systems and E-Glass Fabrics
Source: MDPI journal article supplement (doi:10.3390/polym15092183), 2023-05-04
Supplement: s1 [file s1]

# Method of Manufacturing Structural, Optically Transparent Glass Fiber-Reinforced Polymers (tGFRP) Using Infusion Techniques with Epoxy Resin Systems and E-Glass Fabrics

Klaus Heudorfer <sup>1,†</sup>, Johannes Bauer <sup>1,†</sup>, Yavuz Caydamli <sup>2,3,†</sup>, Bruno Gompf <sup>4</sup>, Jens Take <sup>1</sup>,  
Michael R. Buchmeiser <sup>2,3,\*</sup> and Peter Middendorf <sup>1,\*</sup>

<sup>1</sup> Institute of Aircraft Design (IFB), University of Stuttgart, Pfaffenwaldring 31, D-70569 Stuttgart, Germany; heudorfer@ifb.uni-stuttgart.de (K.H.); bauer@ifb.uni-stuttgart.de (J.B.); take@ifb.uni-stuttgart.de (J.T.)

<sup>2</sup> Institute of Polymer Chemistry (IPOC), University of Stuttgart, Pfaffenwaldring 55, D-70569 Stuttgart, Germany; yavuz.caydamli@ipoc.uni-stuttgart.de

<sup>3</sup> German Institutes of Textile and Fiber Research (DITF), Körschtalstr 26, D-73770 Denkendorf, Germany

<sup>4</sup> 1st Physics Institute, University of Stuttgart, Pfaffenwaldring 57, D-70569 Stuttgart, Germany; b.gompf@pi.uni-stuttgart.de

\* Correspondence: michael.buchmeiser@ipoc.uni-stuttgart.de (M.R.B.); middendorf@ifb.uni-stuttgart.de (P.M.)

† These authors contributed equally to this work.

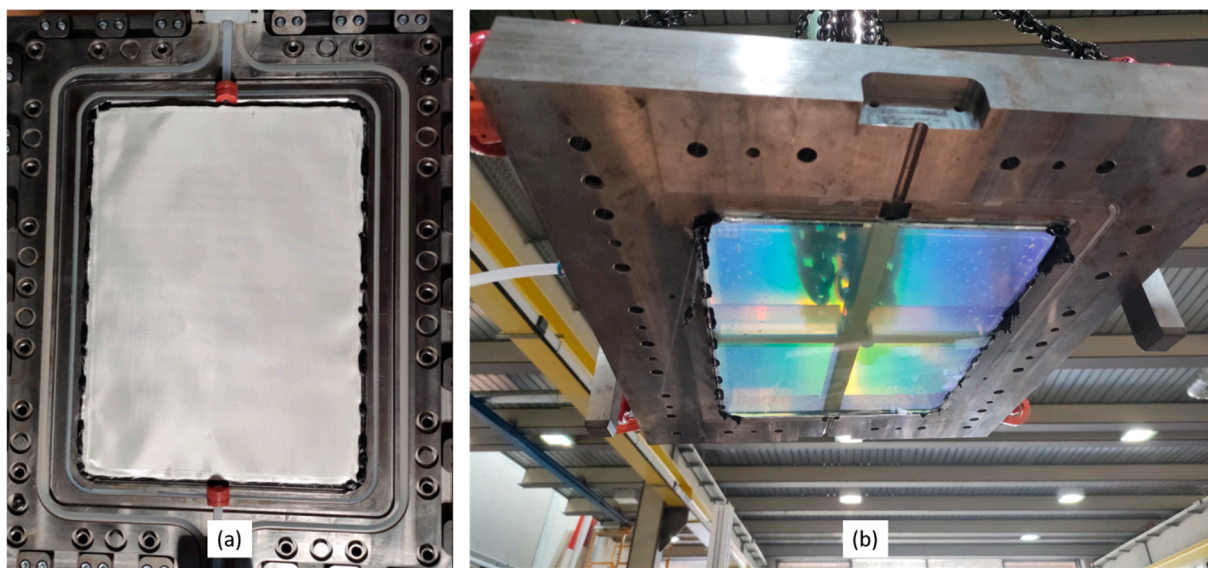

**Figure S1.** (a) Preform in the mold cavity and tacky tape (black) applied to prevent runners on the edges, (b) tGFRP plate sticking to the upper mold when opening after 24 h curing at room temperature.

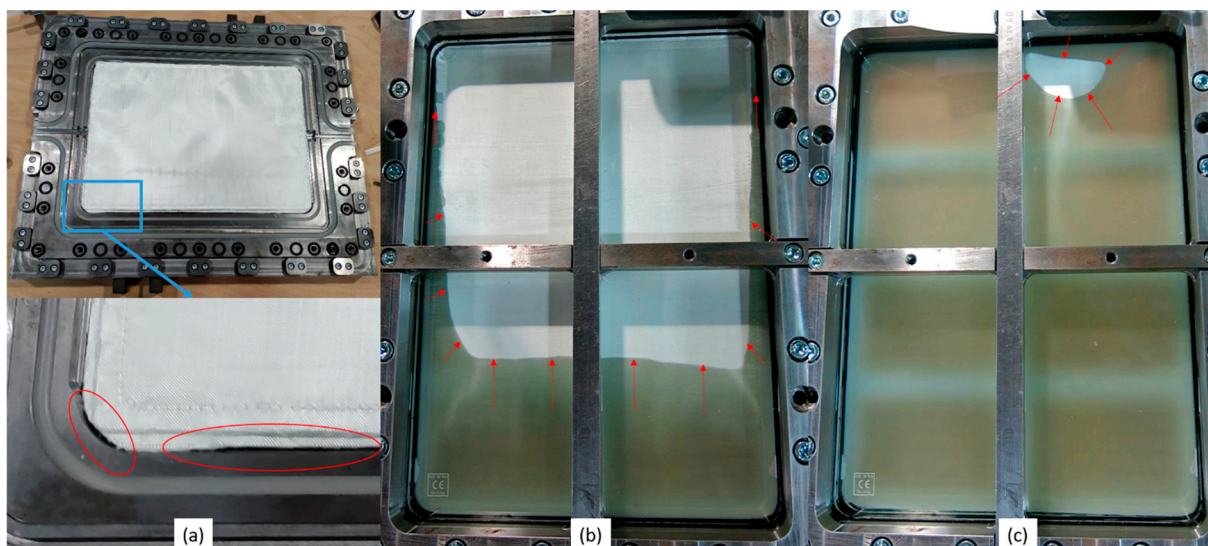

**Figure S2.** (a) Preform with cutting tolerances placed in a stiff mold with defined cavity dimensions leading to a fiber-free volume between preform and mold, (b) race-tracking (runners) on the preform edges, (c) uncontrolled flow-fronts colliding.

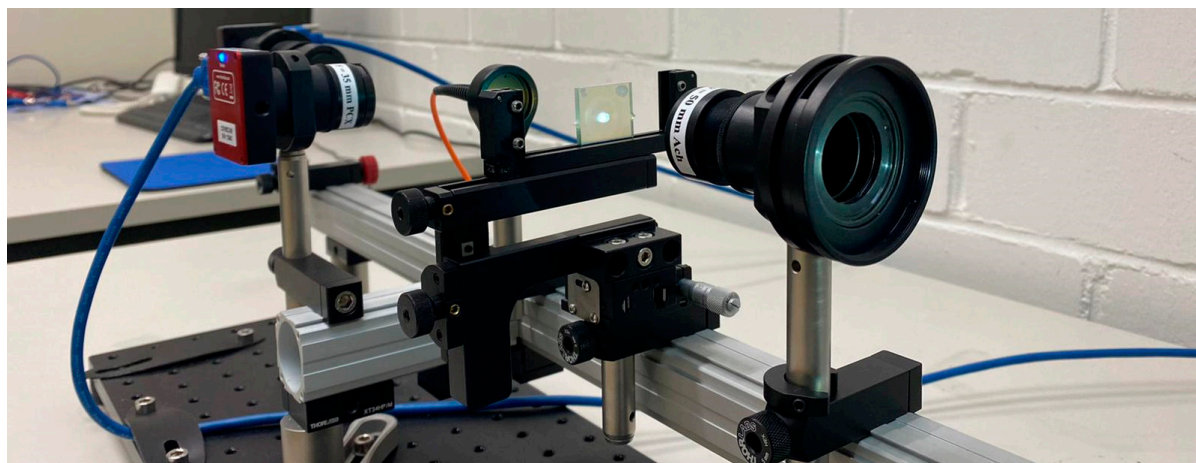

**Figure S3.** Spectrometer for transmittance measurements.

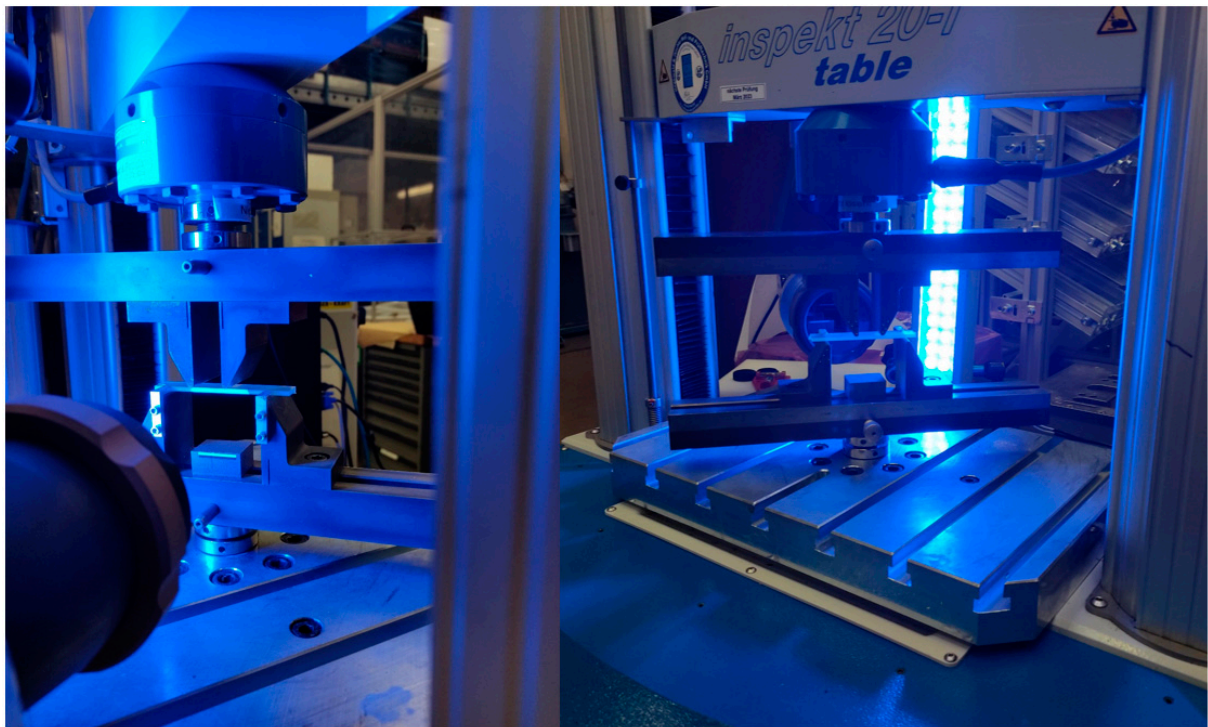

**Figure S4.** Four point bending apparatus (left: backside, right: front side).

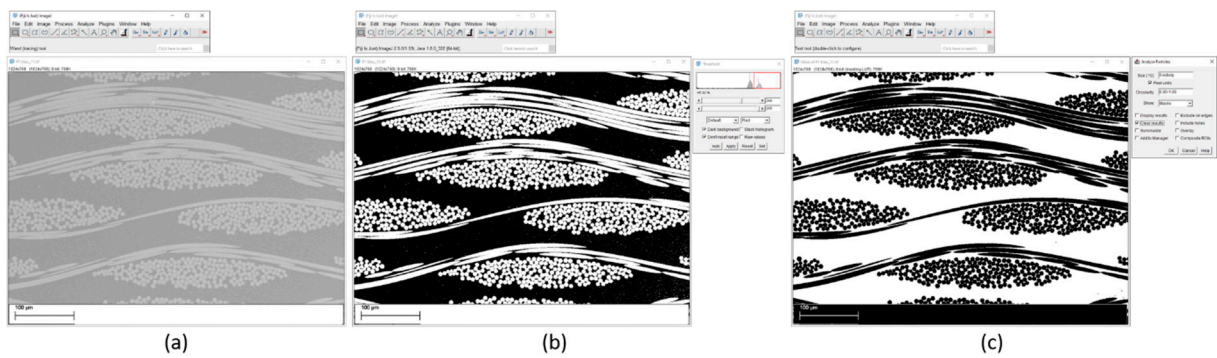

**Figure S5.** Image preprocessing using ImageJ: (a) 8-bit grayscale, (b) BW-image with threshold values, (c) mask of BW-image.

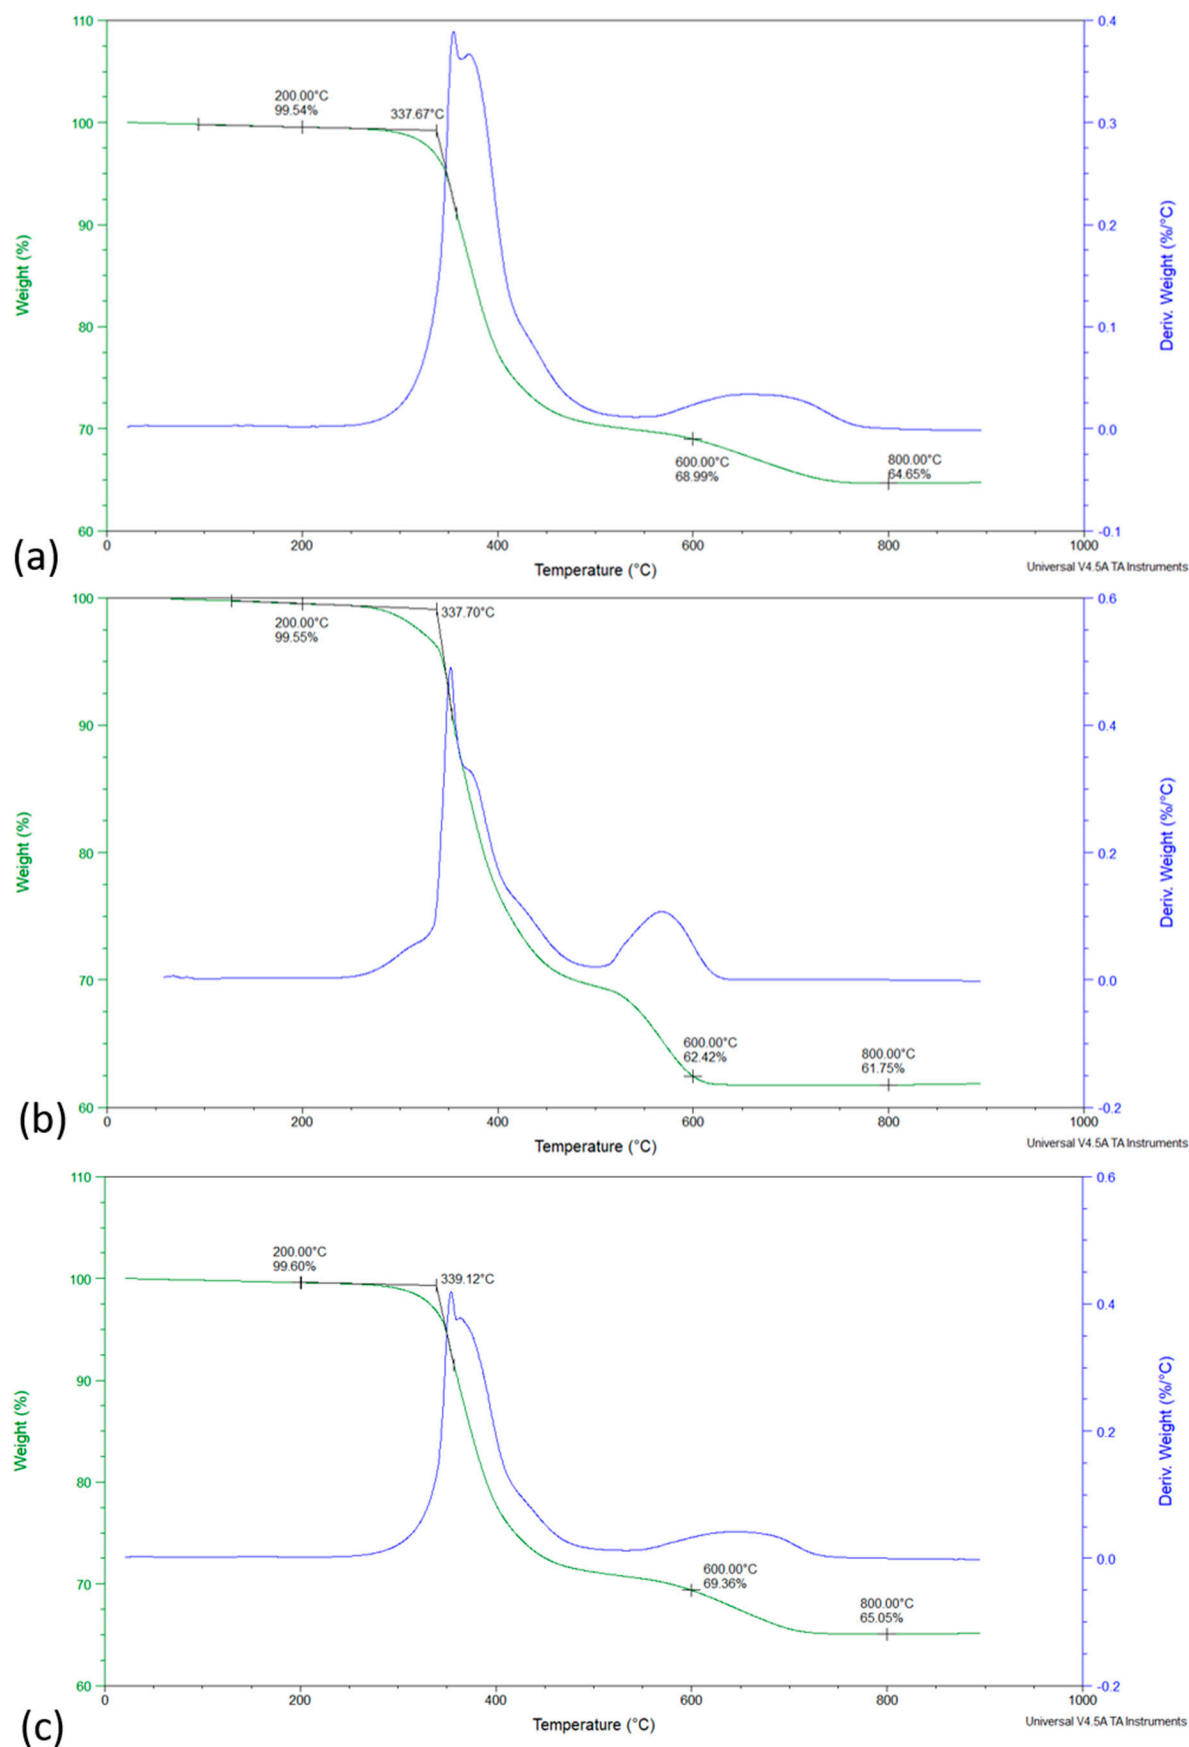

Figure S6. TGA Results of plate (a) 1, (b) 2 and (c) 3.

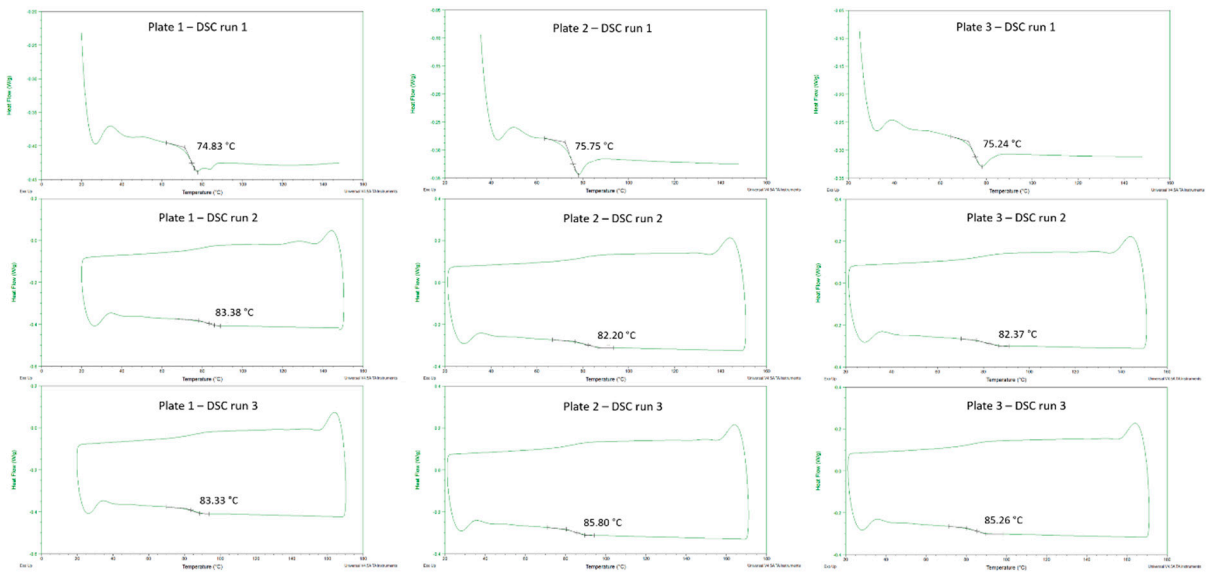

**Figure S7.** DSC results of tGFRP specimens after curing for 24 h at room temperature plus tempering for 15 h at 60 °C.

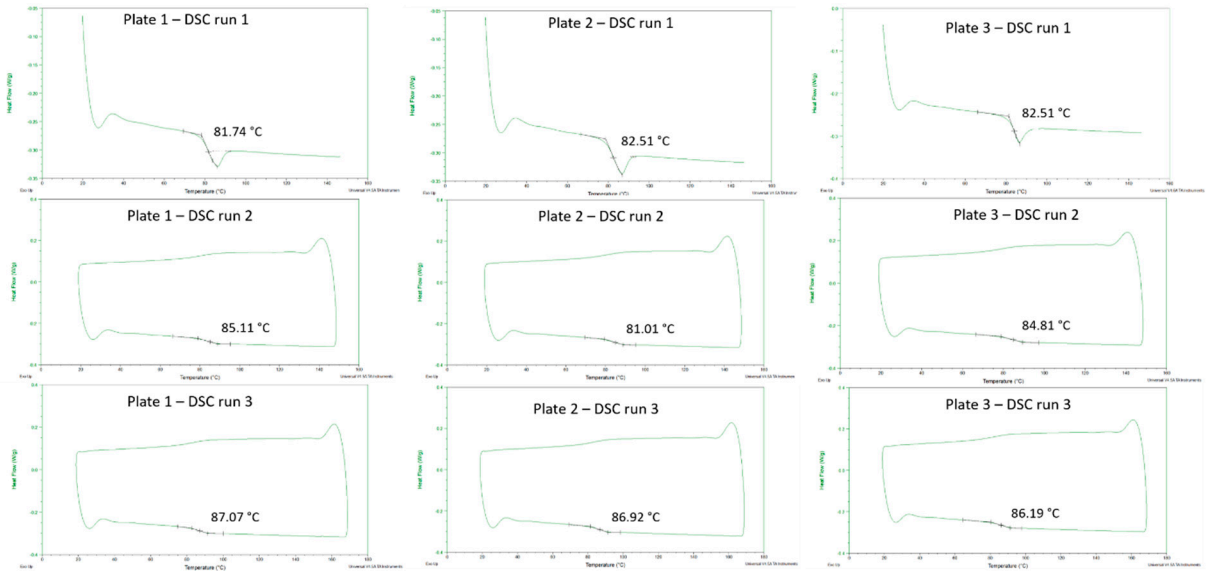

**Figure S8.** DSC results of tGFRP specimens after curing for 24 h at room temperature 39 h at 60 °C.

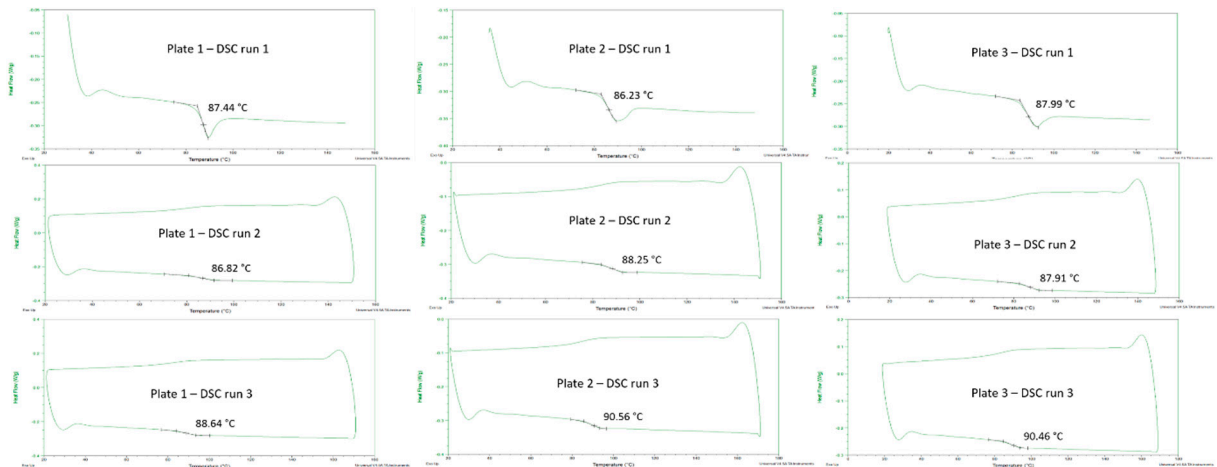

**Figure S9.** DSC results of tGFRP specimens after curing for 24 h at room temperature plus 87 h tempering at 60 °C.

**Table S1.** DSC results: 24 h at room temperature cure plus 15 h tempering at 60 °C.

| tGFRP              | Tg DSC run 1 [°C] | Tg DSC run 2 [°C] | Tg DSC run 3 [°C] |
|--------------------|-------------------|-------------------|-------------------|
| Plate 1            | 74.49             | 83.38             | 83.33             |
| Plate 2            | 75.75             | 82.20             | 85.80             |
| Plate 3            | 75.24             | 82.37             | 85.26             |
| Mean               | 75.16             | 82.65             | 84.80             |
| Standard deviation | 0.63              | 0.64              | 1.30              |

**Table S2.** DSC results: 24 h at room temperature cure plus 39 h tempering at 60 °C.

| tGFRP              | Tg DSC run 1 [°C] | Tg DSC run 2 [°C] | Tg DSC run 3 [°C] |
|--------------------|-------------------|-------------------|-------------------|
| Plate 1            | 81.74             | 85,11             | 87,07             |
| Plate 2            | 82.51             | 85,01             | 86,92             |
| Plate 3            | 84.01             | 84,81             | 86,19             |
| Mean               | 82.75             | 84.98             | 86.73             |
| Standard deviation | 1.15              | 0.15              | 0.47              |

**Table S3.** DSC results: 24 h at room temperature cure plus 87 h tempering at 60 °C.

| tGFRP              | Tg DSC run 1 [°C] | Tg DSC run 2 [°C] | Tg DSC run 3 [°C] |
|--------------------|-------------------|-------------------|-------------------|
| Plate 1            | 87.44             | 86.82             | 88.64             |
| Plate 2            | 86.23             | 88.25             | 90.56             |
| Plate 3            | 87.99             | 87.91             | 90.46             |
| Mean               | 87.22             | 87.66             | 89.89             |
| Standard deviation | 0.90              | 0.75              | 1.08              |

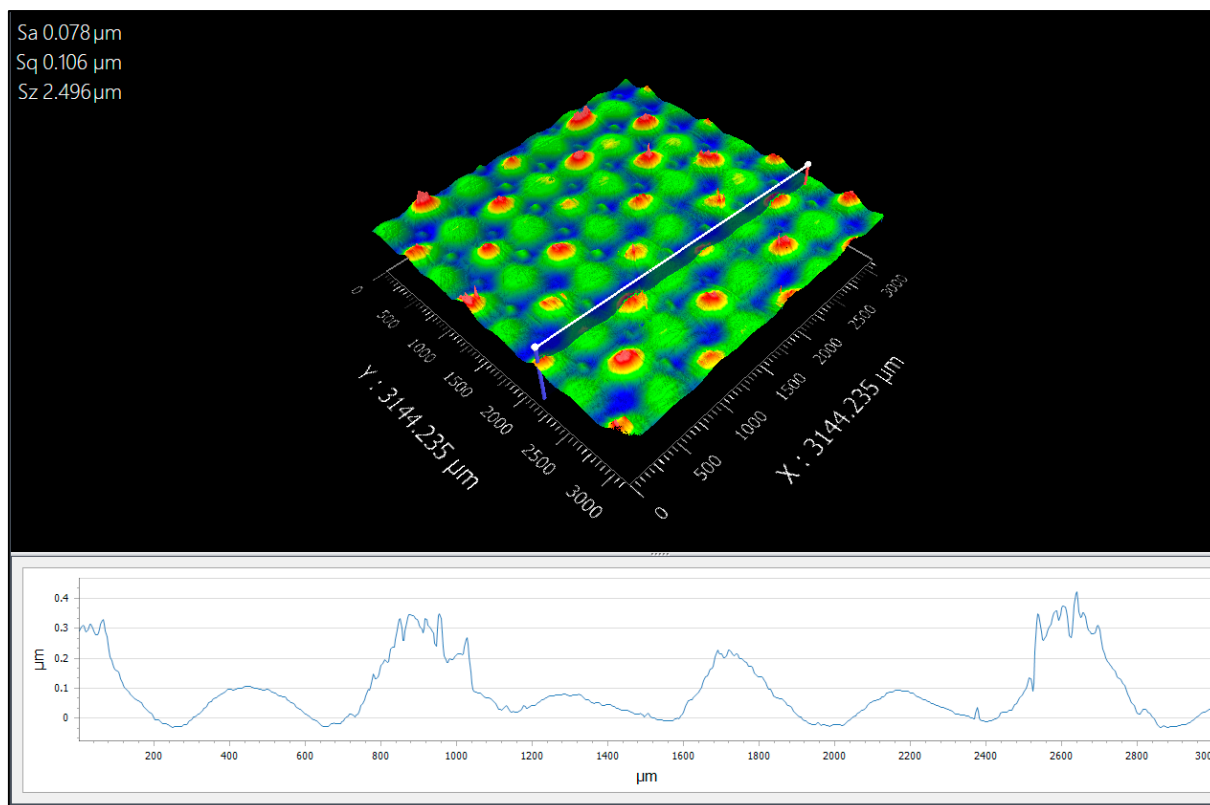

**Figure S10.** White light Interferometer data of the top surface of the Optical-RTM produced sample.

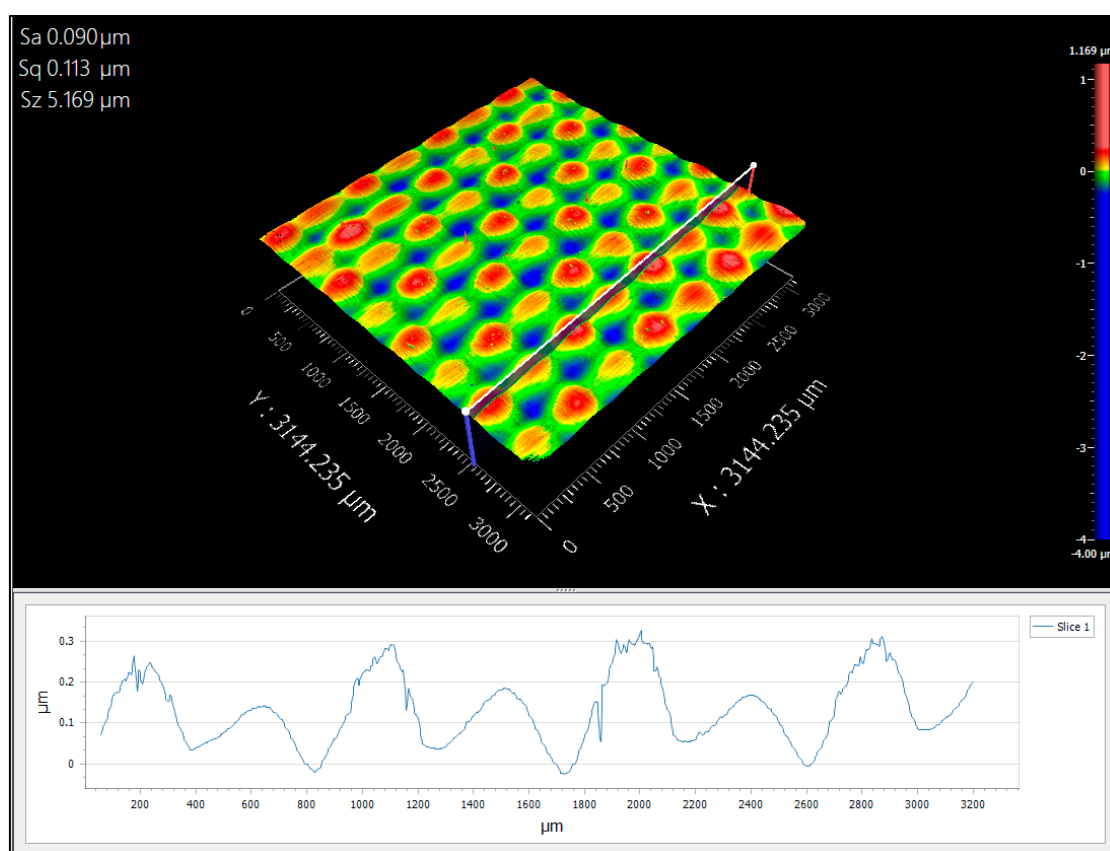

**Figure S11.** White light Interferometer data of the bottom surface of the Optical-RTM produced sample.

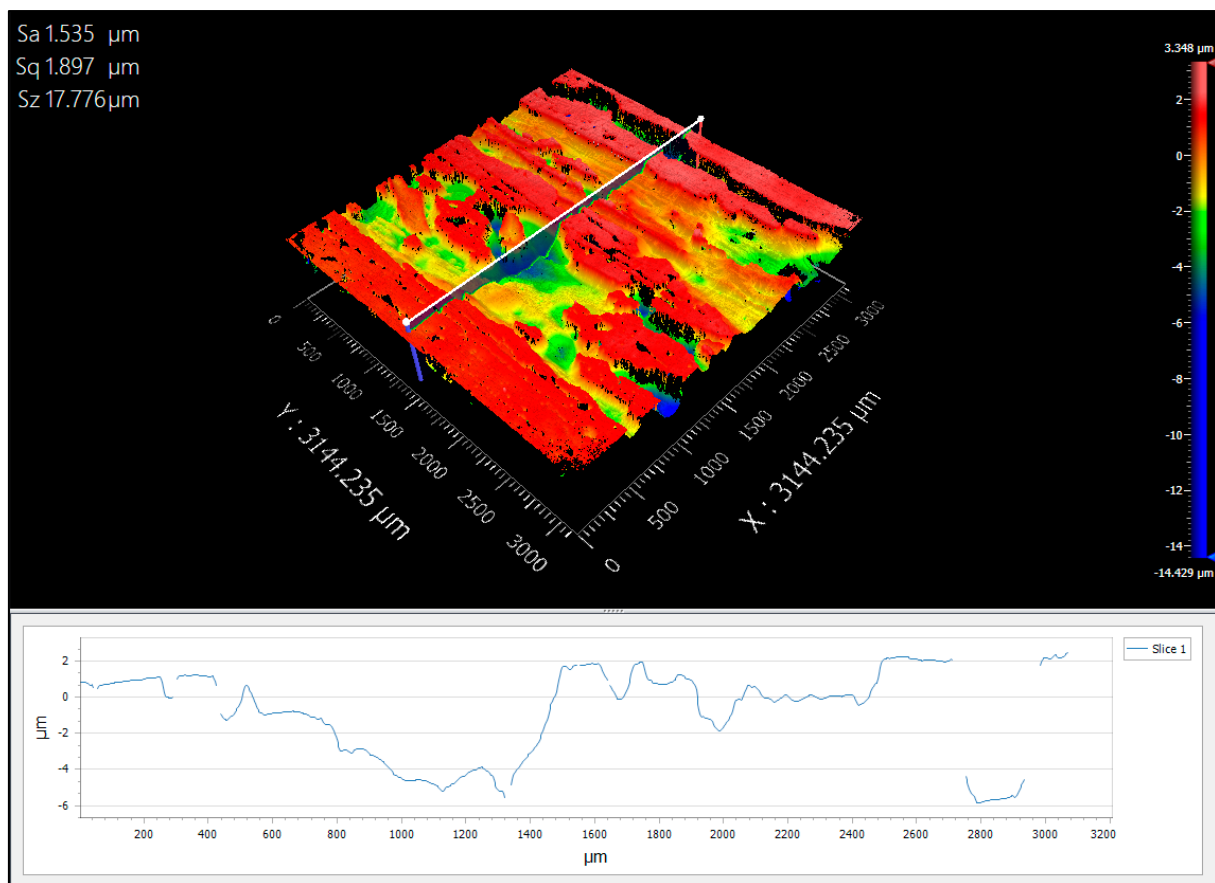

**Figure S12.** White light Interferometer data of the top surface of the standard-RTM produced sample.

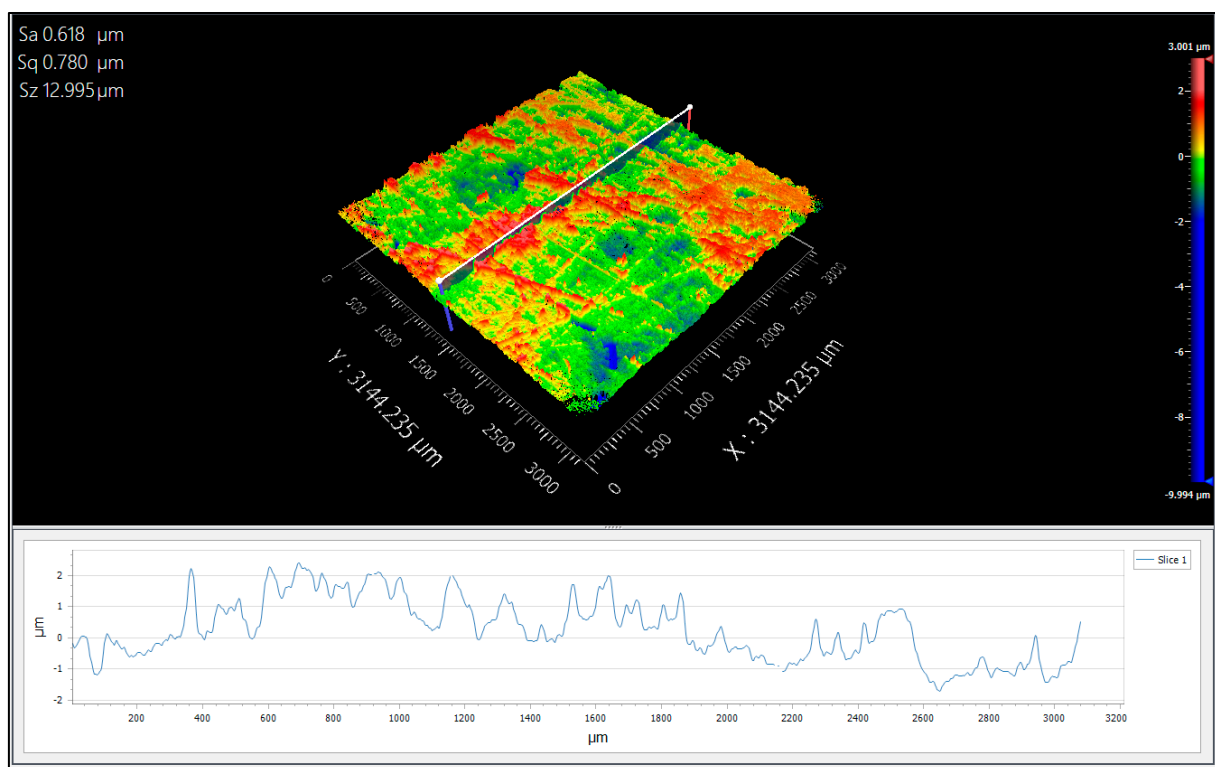

**Figure S13.** White light Interferometer data of the bottom surface of the standard-RTM produced sample.

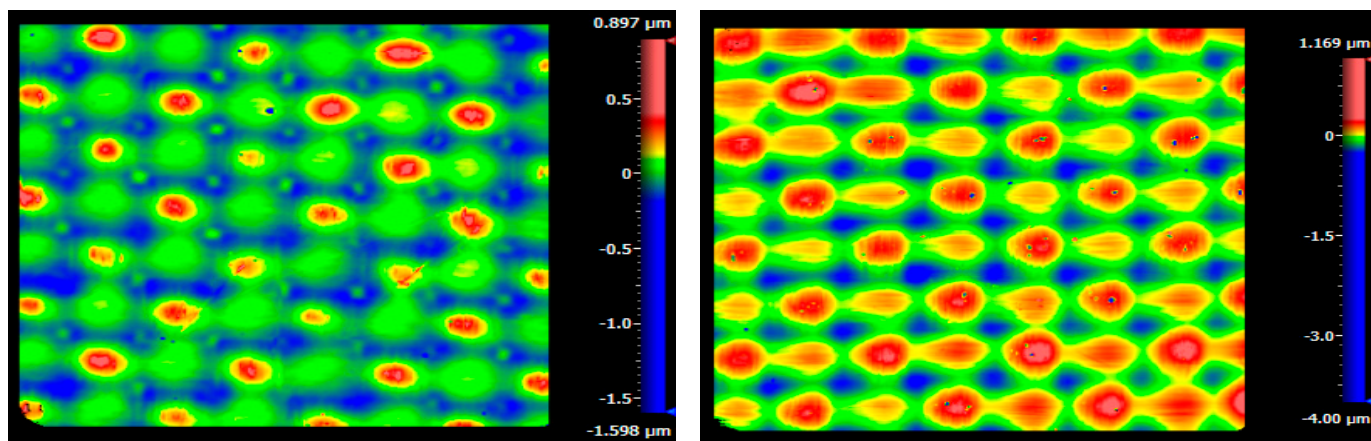

**Figure S14.** 2D view of the white light interferometer data of the Optical-RTM produced sample; left: top, right: bottom surfaces.

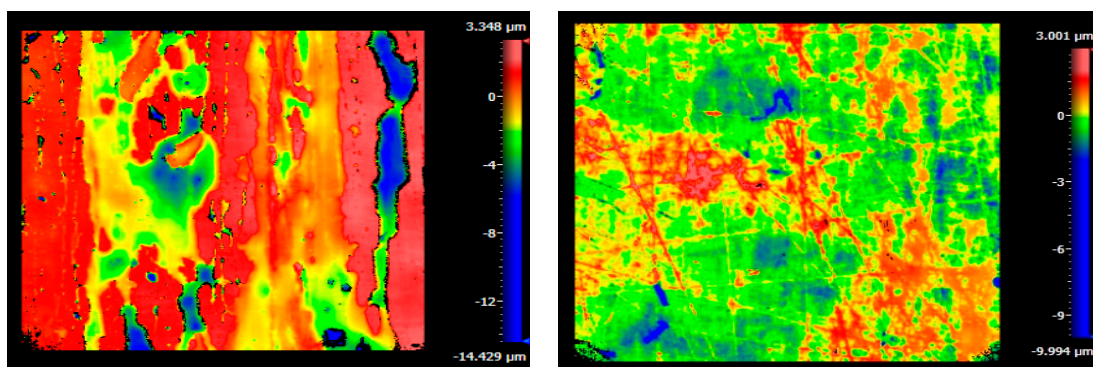

**Figure S15.** 2D view of the white light interferometer data of the standard-RTM produced sample; left: top, right: bottom surfaces.

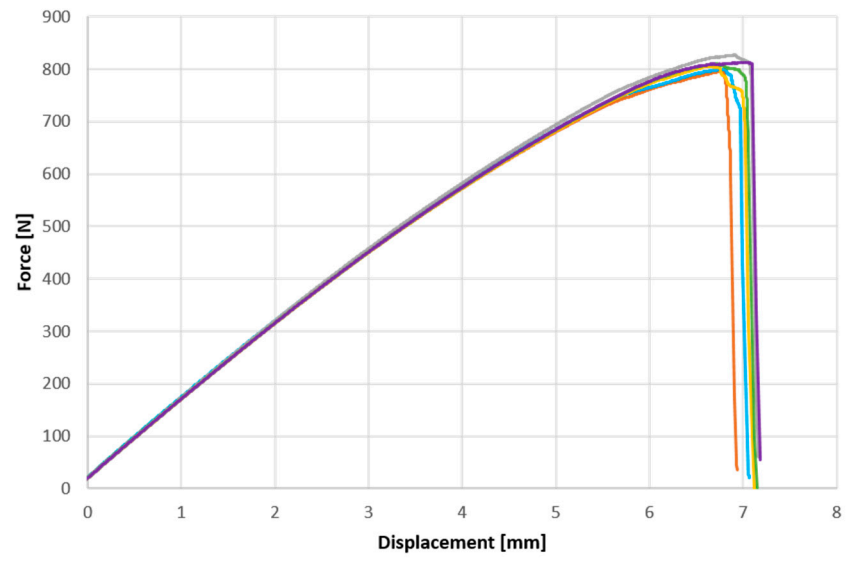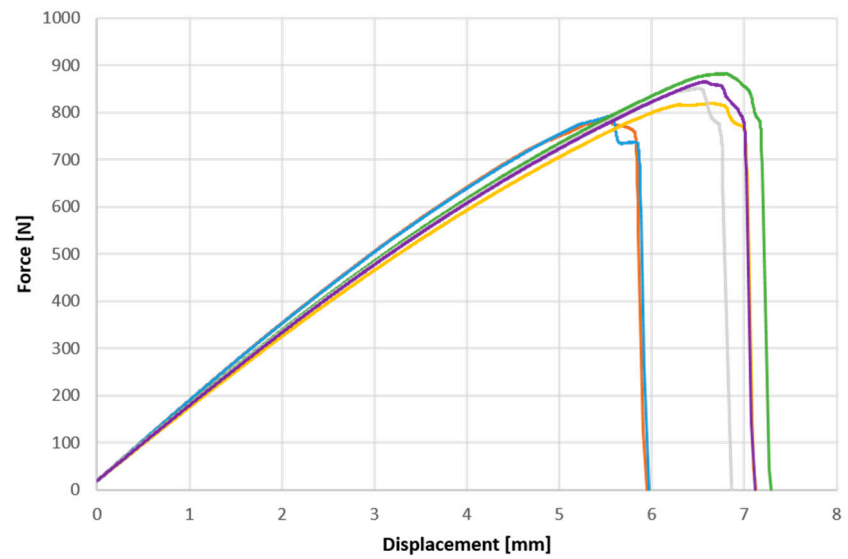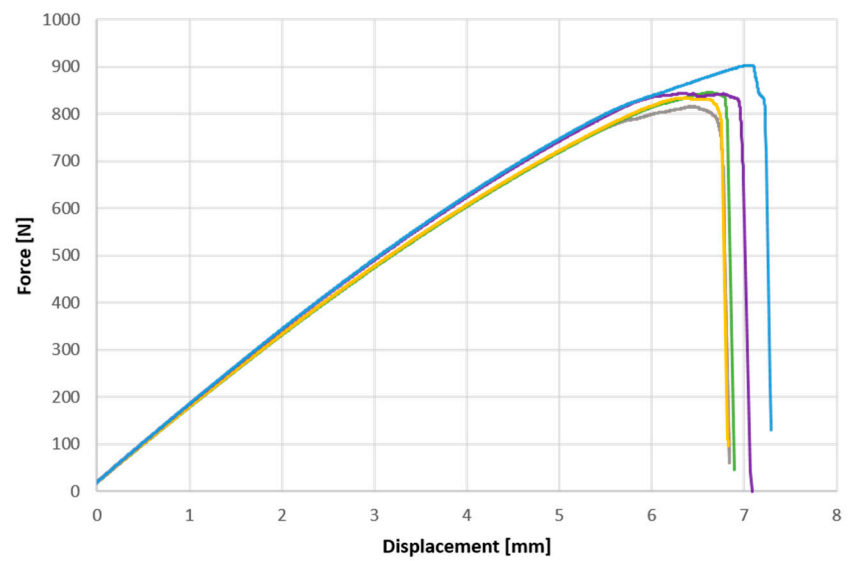

**Figure S16.** Force-Displacement diagrams of the four point bending characterization of tGFRP plate 1-3 (top to bottom).
